# Supplementary material for: Nested Russian Doll-Like Genetic Mobility Drives Rapid Dissemination of the Carbapenem Resistance Gene blaKPC
Source: PubMed Central journal article supplement (PMC4879409; doi:10.1128/aac.00464-16), 2016-05-23
Supplement: AAC.00464-16_zac006165250so1.pdf [file AAC.00464-16_zac006165250so1.pdf]

## Supplementary Methods

### Isolate collection and Illumina sequencing

Illumina sequencing was performed as previously (1), with the exception of three isolates, CAV1602, CAV1606 and CAV1697. For these, genomic DNA was extracted using a QIAcube automated sample preparation station (Qiagen, San Diego, CA) and libraries for sequencing were generated and normalized using the Nextera XT DNA library preparation kit (Illumina, San Diego, CA). Whole genome sequencing was performed on a MiSeq benchtop sequencer (Illumina, San Diego, CA, USA), utilizing 500 cycles of paired-end reads.

Isolates from 204 patients were prospectively collected and identified as having *bla*<sub>KPC</sub> by PCR, however a small number of these isolates were not viable, were incorrectly labelled, lost *bla*<sub>KPC</sub> through laboratory passage or were contaminated during the cataloguing process. We initially performed Illumina sequencing on 294 available *bla*<sub>KPC</sub>-positive isolates. In ten isolates, the entire Tn4401 region (including *bla*<sub>KPC</sub>) was absent from the sequencing data (as determined by BLASTn comparisons with the isolate's *de novo* assembly), presumably due to plasmid loss in culture. Three additional isolates showed inconsistencies in species classification (see below). These 13 isolates were therefore excluded, leaving 281 isolates from 182 patients for analysis.

### Species classification

Species classification was initially performed in the clinical microbiology lab using the VITEK2 system with the GN ID card (bioMérieux, Durham, NC). To provide an independent classification method, Illumina sequenced reads were taxonomically assigned using Kraken version 0.10.4-beta (2) with the MiniKraken database from March 30<sup>th</sup>, 2014. The top species was considered as a positive match if >20% of the reads were assigned to this species. If <10% of reads were assigned to the top species, we postulated that the correct species was most likely not in the MiniKraken database. In this case, a presumed species was determined from the microbiological classification and/or similarity in the Kraken results to other isolates with more definitive microbiological classifications (this applied to *Citrobacter amalonaticus*, *Citrobacter freundii*, and *Kluyvera intermedia*). All isolates were then mapped to species-specific references, where available, and species classification was confirmed by the quality of this mapping. For three related isolates from patient AM, the microbiology lab was able to classify only to family level (*Enterobacteriaceae*), and a species could not be determined by the sequence-based method; these are considered to represent an unknown species and have been labelled as 'Other'. Three further isolates produced inconsistent results from the two classification methods (possible labelling errors) and were therefore excluded from further analyses.

### Phylogenetic analysis and strain classification

For each species represented by at least three isolates after the removal of within-patient duplicates (see main Methods), phylogenetic analysis was performed using PhyML version 20120412 (3) with an alignment consisting of all variable sites as identified through mapping to a species-specific chromosomal reference (Supplementary Table 5), padded to the length of the reference with invariant sites of the same GC content as the original data. For species

represented by only two isolates, PhyML could not be used. In these cases tree topology is unambiguous and branch length was taken to be the proportion of variant sites between the two isolates.

Genetic clusters were defined using the above phylogenies as follows: Isolates were considered to belong to the same strain if they both descended (directly or indirectly) from an internal node with at least one path to a tip consisting only of branches with length  $<10^{-4}$  (corresponds to 500 SNVs for a 5 Mb chromosome). This essentially partitions the tree on long branches, but as the cutoff used for a long branch is deliberately quite high, the method will tend to overcluster (i.e. it is conservative in the definition of a chromosomally distinct strain).

### **Long-read PacBio sequencing**

To refine each of the initial PacBio assemblies, Illumina reads from the corresponding isolate were mapped using bwa-mem version 0.7.5a-r405 (4) and visualised using Gap5 v1.2.14-r (5). Unmapped reads were *de novo* assembled using a5-miseq version 20140401 (6) to identify small plasmids, as these were expected to be absent from the PacBio assembly due to size selection of the input DNA (i.e.  $<7$ kb DNA fragments were removed). Plasmid and chromosome structures were closed by resolving repeats at the ends of contigs. As the repeats were generally imperfect, mapping information was used to determine the correct sequence in each case. To validate the final assembly structures, each replicon was re-linearised in a non-repeat region, the Illumina reads were remapped, and Gap5 was used for visualisation, confirming the absence of misassemblies. The consensus sequence from mapping was also used to correct minor errors in the assembly sequence (generally single base indels in homopolymeric regions).

For one isolate (CAV1344), closed *bla*<sub>KPC</sub> plasmid structure(s) could not be obtained and further investigation revealed the most likely cause to be a mixture of plasmid structures in the DNA population that was sequenced. Therefore, we re-isolated DNA from a single colony and repeated PacBio sequencing, which was then successful. We report the results of the latter sequencing, although it should be noted that our Illumina sequence data was obtained from the presumably mixed population.

### **Analysis of Tn4401 flanking sequences**

For each plasmid that was classified as being present, the *de novo* assembly was further examined to determine, if possible, whether Tn4401 was in fact contained within this plasmid in the expected sequence context. For plasmids where Tn4401 was not inserted into a Tn2-like element, 400 bp of flanking sequence from each side of Tn4401 in the reference plasmid sequence was used to query the *de novo* assembly using BLASTn. For each side, if there was a single contig covering the entire 400 bp region, 400 bp of sequence adjacent to the match was compared with the expected Tn4401 sequence, as well as the sequence on the other side of Tn4401 in the plasmid reference. If both sides matched the expected Tn4401 sequence, then the plasmid was classified as containing Tn4401 in that isolate. If the two sides matched each other over a length of  $\geq 300$  bp (i.e. the insertion site was assembled without containing Tn4401, but possibly with minor indels) then the plasmid was classified as not containing Tn4401. In any other situation (generally if there were contig breaks at or close to the Tn4401 insertion sites) then the plasmid was classified as uncertain.

For plasmids where Tn4401 was inserted into a Tn2-like element, the immediate sequence flanking Tn4401 would not be sufficient to distinguish between these different plasmids. Therefore, to classify one of these plasmids as containing Tn4401, we required that for each side of Tn4401, the entire Tn2 region from the reference plasmid, along with 400 bp on either side (i.e. 400 bp of Tn4401 sequence, the Tn2 region, and 400 bp of sequence specific to that plasmid) was present in the *de novo* assembly as a continuous sequence on a single contig. To classify one of these plasmids as not containing Tn4401, the same method was used as for non-Tn2 plasmids above. In other words, if the region of Tn2 encompassing the Tn4401 integration site was assembled as a continuous sequence on a single contig, then we assumed that Tn4401 could not be integrated into a Tn2-like element in any plasmid in that isolate.

For the identification of novel Tn4401 insertion sites without a flanking Tn2-like element, a similar method was used, with the initial query sequence consisting of 400 bp at either end of Tn4401. The adjacent sequences were then compared with the *bla*<sub>KPC</sub> plasmids identified from long-read sequencing, and we report isolates where at least 400 bp of flanking sequence on either side of Tn4401 could be determined, and had little/no homology to any of the known PacBio *bla*<sub>KPC</sub> plasmids.

### **Epidemiological classification**

For each patient, *bla*<sub>KPC</sub> acquisition source was epidemiologically classified as either “local” (likely acquisition within UVaMC) or “imported” (likely acquisition prior to UVaMC admission), on the basis of hospitalisation time at UVaMC prior to *bla*<sub>KPC</sub> isolation, with an arbitrary 48h cutoff (see main Methods for details). While this may have resulted in a small number of misclassifications, this is expected to be minimal, for the following reasons.

Firstly, extensive surveillance screening was performed: Beginning April 27<sup>th</sup> 2009, weekly perirectal screening was performed for all patients from selected high risk patient care units where a persistently high incidence of carbapenamase-producing *Enterobacteriaceae* (CPE) was detected, as well as inpatient units caring for a patient known to be colonized or infected with CPE (for example this resulted in 6860 surveillance cultures performed in 2012) (7, 8). Additionally, the median length of hospital stay immediately prior to first *bla*<sub>KPC</sub>-positive isolate for the 167 local acquisitions with a sequenced isolate was 13 days (IQR 4-28.5 days), with 62/130 (48%) local acquisitions following screening onset having at least one negative surveillance culture prior to the first positive, 45/62 (73%) of which were within the same hospital stay. Given the extent of screening, the length of hospitalisation prior to *bla*<sub>KPC</sub> isolation, and the presence of prior negative cultures in many cases, the classification of “local” acquisitions should be robust.

With respect to the robustness of the “imported” classification, all but one of the imports had recent outside hospital exposure, consistent with *bla*<sub>KPC</sub> *Enterobacteriaceae* being healthcare acquired. The one exception had a *bla*<sub>KPC</sub> isolate with 0 SNV differences relative to two other isolates from other patients in the same ward on the same day, indicating that in this case *bla*<sub>KPC</sub> was likely acquired within the first 48h of admission (i.e. a false “imported” classification).

## Transmission analysis

An upper bound for the number of potential patient-to-patient transmission events was determined by identifying all possible donor-recipient pairs from the 182 patients with sequenced isolates where the donor and recipient patients were on the same ward at the same time at least one day prior to the first isolation of a *bla*<sub>KPC</sub>-positive *Enterobacteriaceae* isolate from the recipient. Patients were considered at risk for being a donor of *bla*<sub>KPC</sub>-positive *Enterobacteriaceae* at any point during hospitalization (i.e. before as well as after their first positive isolate, conservatively including all time in hospital even if the patient had previous negative cultures), and were considered to be carriers for the duration of the study. Potential donor-recipient pairs with shared bacterial strains (<200 SNVs) or Tn4401 variants were then identified. For each level of genetic relatedness (strain or Tn4401 variant), a transmission network was constructed and plausible transmission events were identified to maximise the number of potential recipients using a method adapted from (9).

## References

1. **Mathers AJ, Stoesser N, Sheppard AE, Pankhurst L, Giess A, Yeh AJ, Didelot X, Turner SD, Sebra R, Kasarskis A, Peto T, Crook D, Sifri CD.** 2015. Klebsiella pneumoniae carbapenemase (KPC) producing K. pneumoniae at a Single Institution: Insights into Endemicity from Whole Genome Sequencing. *Antimicrob Agents Chemother.*
2. **Wood DE, Salzberg SL.** 2014. Kraken: ultrafast metagenomic sequence classification using exact alignments. *Genome Biol* **15**:R46.
3. **Guindon S, Gascuel O.** 2003. A simple, fast, and accurate algorithm to estimate large phylogenies by maximum likelihood. *Syst Biol* **52**:696-704.
4. **Li H.** 2013. Aligning sequence reads, clone sequences and assembly contigs with BWA-MEM. *arXiv:1303.3997v1301 [q-bio.GN]*.
5. **Bonfield JK, Whitwham A.** 2010. Gap5--editing the billion fragment sequence assembly. *Bioinformatics* **26**:1699-1703.
6. **Coil D, Jospin G, Darling AE.** 2015. A5-miseq: an updated pipeline to assemble microbial genomes from Illumina MiSeq data. *Bioinformatics* **31**:587-589.
7. **Enfield KB, Huq NN, Gosseling MF, Low DJ, Hazen KC, Toney DM, Slitt G, Zapata HJ, Cox HL, Lewis JD, Kundzins JR, Mathers AJ, Sifri CD.** 2014. Control of simultaneous outbreaks of carbapenemase-producing enterobacteriaceae and extensively drug-resistant *Acinetobacter baumannii* infection in an intensive care unit using interventions promoted in the Centers for Disease Control and Prevention 2012 carbapenemase-resistant Enterobacteriaceae Toolkit. *Infect Control Hosp Epidemiol* **35**:810-817.
8. **Mathers AJ, Poulter M, Dirks D, Carroll J, Sifri CD, Hazen KC.** 2014. Clinical Microbiology Costs for Methods of Active Surveillance for Klebsiella pneumoniae Carbapenemase-Producing Enterobacteriaceae. *Infect Control Hosp Epidemiol* **35**:350-355.
9. **Walker AS, Eyre DW, Wyllie DH, Dingle KE, Harding RM, O'Connor L, Griffiths D, Vaughan A, Finney J, Wilcox MH, Crook DW, Peto TE.** 2012. Characterisation of *Clostridium difficile* hospital ward-based transmission using extensive epidemiological data and molecular typing. *PLoS Med* **9**:e1001172.

**Table S1. Details of sequenced isolates.** (Provided as a separate file)

**Table S2. Additional Tn4401 insertion sites ascertained from short-read Illumina data**

| Patients | Isolates                           | Species              | Genetic cluster | Length left (kb) <sup>a</sup> | Length right (kb) <sup>a</sup> | Tn4401 variant | Flanking sequence <sup>b</sup> |
|----------|------------------------------------|----------------------|-----------------|-------------------------------|--------------------------------|----------------|--------------------------------|
| FA       | CAV1417, CAV1427, CAV1471, CAV1550 | <i>K. pneumoniae</i> | Kpne-4          | 5                             | 28                             | Tn4401b-7      | ATGAA...ATGAA                  |
| AD       | CAV1062, CAV1127                   | <i>K. pneumoniae</i> | Kpne-2          | 4                             | 3                              | Tn4401a-1      | ATTGA...GGTTT <sup>c</sup>     |
| FY       | CAV1453, CAV1477                   | <i>K. pneumoniae</i> | Kpne-2          | 111                           | 136                            | Tn4401a-1      | AATAA...CTATT <sup>c</sup>     |
| CI, IV   | CAV1378, CAV1746                   | <i>K. pneumoniae</i> | Kpne-2          | 2                             | 7                              | Tn4401a-1      | ATTGA...ATTGA                  |
| AM       | CAV1074                            | <i>K. pneumoniae</i> | NA              | 2                             | 1                              | Tn4401b-3      | AATAA...AATAA                  |
| IN       | CAV1752                            | <i>K. oxytoca</i>    | NA              | 32                            | 52                             | Tn4401b-1      | AACAA...AACAA                  |
| FR       | CAV1459                            | <i>E. cloacae</i>    | Eclo-5          | 3                             | 2                              | Tn4401b-2      | GTTTT...GTTTT                  |

<sup>a</sup> Length of flanking sequence on the same contig as each end of Tn4401

<sup>b</sup> Sequences immediately flanking Tn4401; generally expected to be identical due to 5 bp target site duplication during transposition

<sup>c</sup> No evidence of target site duplication

**Table S3. Association of importation status with *K. pneumoniae* and the epidemic *bla*<sub>KPC</sub> *K. pneumoniae* strain ST258**

| Source of acquisition | <i>K. pneumoniae</i> <sup>a</sup> | No <i>K. pneumoniae</i> <sup>b</sup> | <i>K. pneumoniae</i> ST258 <sup>c</sup> | <i>K. pneumoniae</i> , no ST258 <sup>d</sup> |
|-----------------------|-----------------------------------|--------------------------------------|-----------------------------------------|----------------------------------------------|
| Imported              | 12                                | 3                                    | 9                                       | 3                                            |
| Local                 | 43                                | 124                                  | 3                                       | 40                                           |
|                       | $p < 0.0001^e$                    |                                      | $p < 0.0001^e$                          |                                              |

<sup>a</sup> Patients with at least one *K. pneumoniae* isolate (includes patients with *K. pneumoniae* and another species)

<sup>b</sup> Patients with no *K. pneumoniae* isolates (excludes patients with *K. pneumoniae* and another species)

<sup>c</sup> Patients with at least one *K. pneumoniae* ST258 isolate (includes patient FK who has both ST258 *K. pneumoniae* and non-ST258 *K. pneumoniae*)

<sup>d</sup> Patients with at least one *K. pneumoniae* isolate, but no ST258 (excludes patient FK)

<sup>e</sup> Fisher's exact test

**Table S4. Patients with multiple *bla*<sub>KPC</sub>-positive strains or species**

| Patient | Species                   | Strain | Tn4401 variant           |
|---------|---------------------------|--------|--------------------------|
| B       | <i>K. pneumoniae</i>      | Kpne-6 | Tn4401b-1                |
|         | <i>K. oxytoca</i>         | Koxy-1 | Tn4401b-1                |
| AF      | <i>C. freundii</i>        | Cfre-2 | Tn4401b-1                |
|         | <i>E. cloacae</i>         | Eclo-2 | Tn4401b-1                |
| CB      | <i>R. ornithinolytica</i> | NA     | Tn4401b-1                |
|         | <i>K. pneumoniae</i>      | NA     | Tn4401b-1                |
| DJ      | <i>E. cloacae</i>         | Eclo-2 | Tn4401b-1                |
|         | <i>K. pneumoniae</i>      | NA     | Tn4401b-1                |
| DU      | <i>K. pneumoniae</i>      | Kpne-1 | Tn4401b-1                |
|         | <i>E. cloacae</i>         | NA     | Tn4401b-1                |
| ED      | <i>K. oxytoca</i>         | Koxy-2 | Tn4401b-1                |
|         | <i>C. freundii</i>        | NA     | Tn4401b-1                |
| GV      | <i>E. cloacae</i>         | Eclo-2 | Tn4401b-1                |
|         | <i>K. oxytoca</i>         | NA     | Tn4401b-1                |
| HA      | <i>E. aerogenes</i>       | NA     | Tn4401b-1                |
|         | <i>K. oxytoca</i>         | Koxy-2 | Tn4401b-1                |
| IN      | <i>K. pneumoniae</i>      | Kpne-1 | Tn4401b-1                |
|         | <i>K. oxytoca</i>         | NA     | Tn4401b-1                |
| AK      | <i>K. pneumoniae</i>      | NA     | Tn4401novel-1            |
|         | <i>E. cloacae</i>         | Eclo-1 | Tn4401novel-1            |
| L       | <i>E. asburiae</i>        | NA     | Tn4401b-2                |
|         | <i>K. pneumoniae</i>      | NA     | Tn4401b-2                |
| FK      | <i>K. pneumoniae</i>      | NA     | Tn4401b-2                |
|         | <i>K. pneumoniae</i>      | Kpne-2 | Tn4401b-2                |
| IL      | <i>K. pneumoniae</i>      | NA     | Tn4401b-2                |
|         | <i>C. amalonaticus</i>    | NA     | Tn4401b-2                |
|         | <i>E. cloacae</i>         | NA     | Tn4401b-2                |
| JT      | <i>E. aerogenes</i>       | NA     | Tn4401b-2                |
|         | <i>E. cloacae</i>         | NA     | Tn4401b-2                |
| AM      | Unknown                   | NA     | Tn4401b-3/4 <sup>a</sup> |
|         | <i>K. pneumoniae</i>      | NA     | Tn4401b-3                |
| GL      | <i>S. marcescens</i>      | Smar-1 | Tn4401b-8                |
|         | <i>C. freundii</i>        | Cfre-2 | Tn4401b-1                |

<sup>a</sup> Two isolates with Tn4401b-3 and one isolate with Tn4401b-4. Note that both Tn4401b-3 and Tn4401b-4 are exclusive to patient AM

**Table S5. Chromosomal references used for mapping**

| Species                           | Number of Isolates | Reference strain                                          | Reference Length (bp) | Median % reference sites called (range) | Accession number |
|-----------------------------------|--------------------|-----------------------------------------------------------|-----------------------|-----------------------------------------|------------------|
| <i>Citrobacter amalonaticus</i>   | 2                  | CAV1321<br>( <i>Citrobacter freundii</i> ) <sup>a</sup>   | 4,976,908             | 60 (60-61)                              | CP011612         |
| <i>Citrobacter freundii</i>       | 30                 | CAV1321 <sup>b</sup>                                      | 4,976,908             | 95 (81-98)                              | CP011612         |
| <i>Enterobacter aerogenes</i>     | 4                  | EA1509E                                                   | 5,419,609             | 88 (87-89)                              | NC_020181.1      |
| <i>Enterobacter asburiae</i>      | 1                  | NCTC 9394<br>( <i>Enterobacter cloacae</i> ) <sup>c</sup> | 4,908,759             | 70 (70-70)                              | NC_021046.1      |
| <i>Enterobacter cloacae</i>       | 96                 | NCTC 9394                                                 | 4,908,759             | 85 (71-89)                              | NC_021046.1      |
| <i>Escherichia coli</i>           | 2                  | DH10B                                                     | 4,686,137             | 80 (78-83)                              | NC_010473.1      |
| <i>Klebsiella pneumoniae</i>      | 94                 | MGH78578                                                  | 5,315,120             | 88 (82-90)                              | CP000647.1       |
| <i>Klebsiella oxytoca</i>         | 35                 | E718                                                      | 6,097,032             | 79 (76-91)                              | NC_018106.1      |
| <i>Kluyvera intermedia</i>        | 7                  | CAV1151 <sup>b</sup>                                      | 5,529,132             | 97 (96-97)                              | CP011602         |
| <i>Proteus mirabilis</i>          | 1                  | HI4320                                                    | 4,063,606             | 87 (87-87)                              | NC_010554.1      |
| <i>Raoultella ornithinolytica</i> | 1                  | B6                                                        | 5,398,151             | 91 (91-91)                              | NC_021066.1      |
| <i>Serratia marcescens</i>        | 5                  | WW4                                                       | 5,241,455             | 81 (80-81)                              | NC_020211.1      |
| Other (unknown)                   | 3                  | NCTC 9394<br>( <i>Enterobacter cloacae</i> ) <sup>a</sup> | 4,908,759             | 46 (46-46)                              | NC_021046.1      |

<sup>a</sup> No species-specific reference available

<sup>b</sup> Comparisons made with long-read (PacBio), fully closed chromosomes for these strains obtained in this study

<sup>c</sup> *E. cloacae* reference used as *E. asburiae* is part of the *E. cloacae* complex

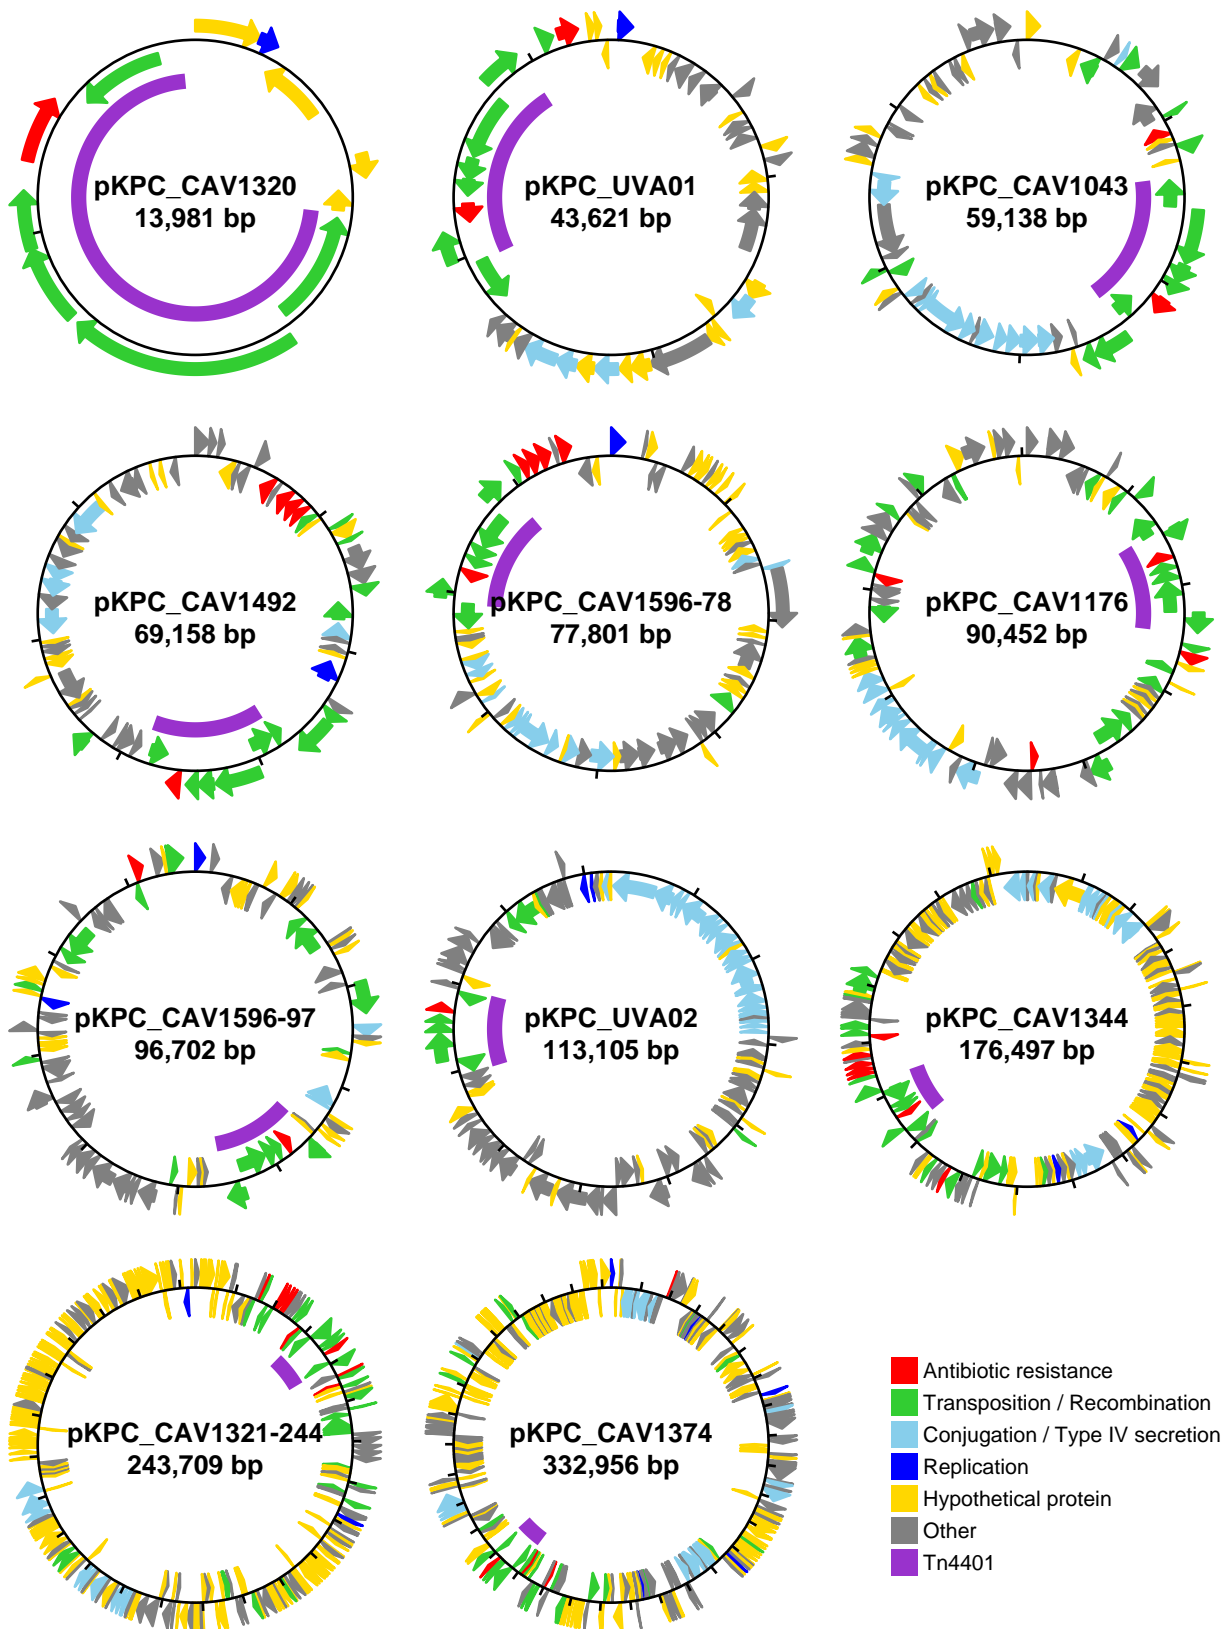

**Figure S1. Distinct *bla*<sub>KPC</sub> plasmids identified through long-read PacBio sequencing.** Variants of the same plasmid backbone (see Table 1) are not shown. Arrows indicate predicted open reading frames; Tn4401 is shown in purple.
